# Supplementary material
Source: PubMed Central journal article supplement (PMC6479262)
Supplement: Supp_Fig3.pdf [file Supp_Fig3.pdf]

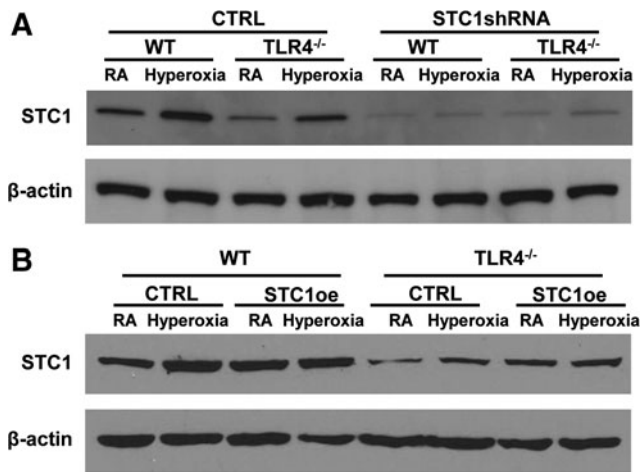

**SUPPLEMENTARY FIG. S3. Manipulation of STC1 expression by lentivirus.** WT and *TLR4*<sup>-/-</sup> MLECs were treated with lentivirus [lenti-Ctrl, lenti-STC1shRNA (**A**), or STC1 overexpression lenti-STC1oe (**B**)] and were exposed to 72 h of hyperoxia or RA as control. Lysates from MLECs were isolated and immunoblotted against STC1 antibody.  $\beta$ -Actin was used as protein loading control. One representative Western blot of three experiments is shown. RA, room air; shRNA, short hairpin RNA. Original gel shown in Supplementary Figure S11.
