# Supplementary material
Source: PubMed Central journal article supplement (PMC6479262)
Supplement: Supp_Fig6.pdf [file Supp_Fig6.pdf]

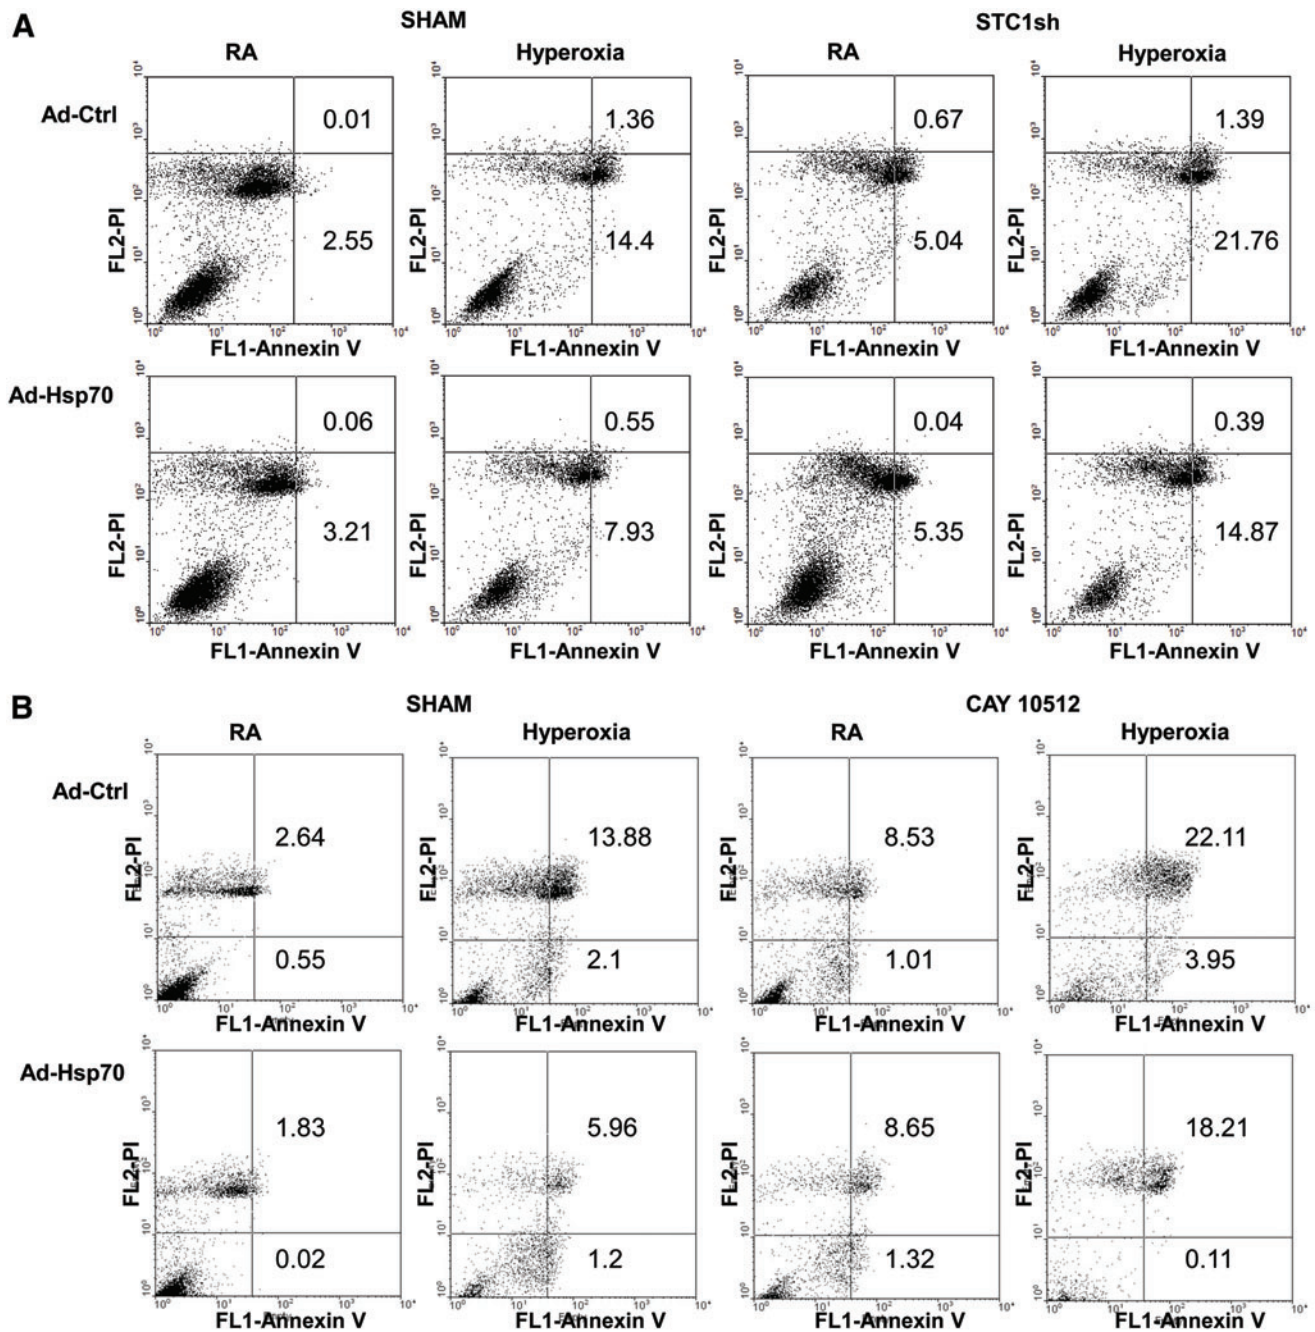

**SUPPLEMENTARY FIG. S6. Representative dot plots of flow cytometry analysis of apoptosis.** (A) Representative dot plots of flow cytometry shown in Figure 4C. (B) Representative dot plots of flow cytometry shown in Figure 5F. Ad-Ctrl, adenovirus-control (CMV-null); Ad-Hsp70, adenoviral Hsp70.
