# Supplementary material
Source: PubMed Central journal article supplement (PMC6479262)
Supplement: Supp_Fig9.pdf [file Supp_Fig9.pdf]

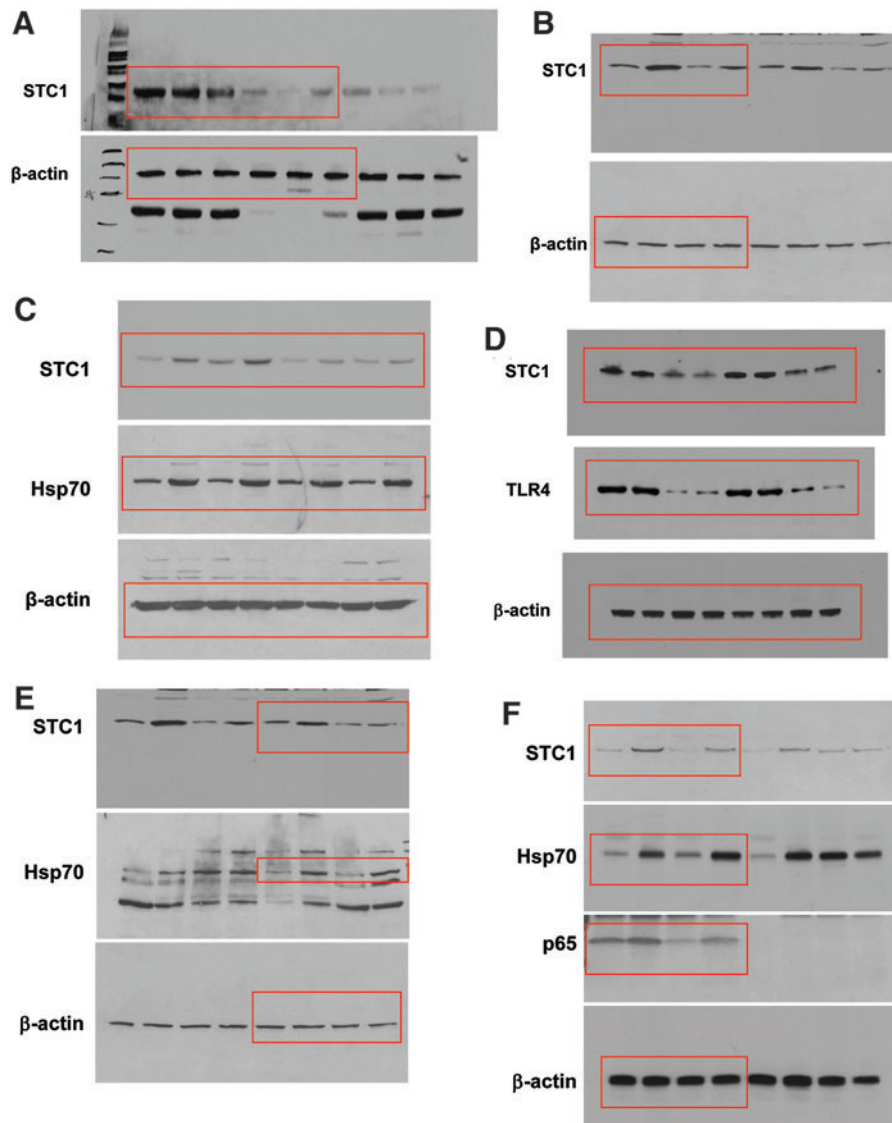

**SUPPLEMENTARY FIG. S9. Uncut Western blots.** (A) Original gel for Figure 1C. (B) Original gel for Figure 3A. (C) Original gel for Figure 4A. (D) Original gel for Figure 4E. (E) Original gel for Figure 4F. (F) Original gel for Figure 5A.
